# Supplementary material for: Proteomic profiling of neonatal herpes simplex virus infection on dried blood spots
Source: PubMed Central journal article supplement — Commun Med (Lond). 2024 Dec 18;4:268. doi: 10.1038/s43856-024-00711-8 (PMC11655519; doi:10.1038/s43856-024-00711-8), 2024-12-18
Supplement: 43856_2024_711_MOESM3_ESM.pdf [file 43856_2024_711_MOESM3_ESM.pdf]

## Description of Additional Supplementary Files

**File name:** Supplementary Data 1

**File description:** Differentially expressed proteins for neonates with disseminated disease compared to controls.

**File name:** Supplementary Data 2

**File description:** Differentially expressed proteins for neonates with CNS disease compared to controls.

**File name:** Supplementary Data 3

**File description:** Differentially expressed proteins for neonates with skin-eye-mouth disease compared to controls.

**File name:** Supplementary Data 4

**File description:** Functional annotation of post-hoc significant proteins (<https://david.ncicrf.gov/>).

**File name:** Supplementary Data 5

**File description:** Raw protein expression data.

**File name:** Supplementary Data 6

**File description:** F-statistics for protein expression comparisons.
